# Supplementary material for: The Activity of Red Nigerian Propolis and Some of Its Components against Trypanosoma brucei and Trypanosoma congolense
Source: MDPI journal article supplement (doi:10.3390/molecules28020622), 2023-01-07
Supplement: s1 [file s1]

**The activity of red Nigerian propolis and some of its components against *Trypanosoma brucei* and *Trypanosoma congolense***

Samya S. Alenezi<sup>1</sup>, Naif D. Alenezi<sup>1</sup>, Godwin U. Ebiloma<sup>2,4</sup>, Manal J. Natto<sup>2</sup>, Marzuq A. Ungogo<sup>2,4</sup>, John O. Igoli<sup>2,3</sup>, Valerie A. Ferro<sup>1</sup>, Alexander I. Gray<sup>1</sup>, James Fearnley<sup>4</sup>, Harry P. de Koning<sup>\*2</sup>, David G. Watson<sup>1\*</sup>

**Supplementary material**

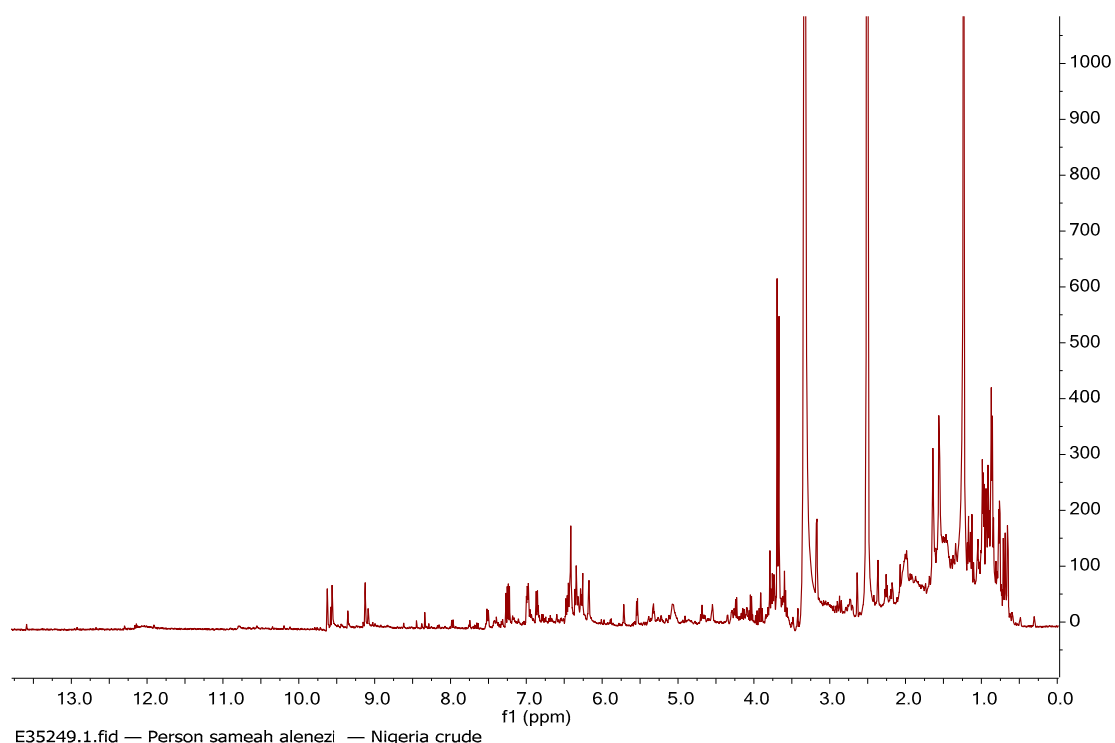

Figure S1: <sup>1</sup>H NMR (500 MHz) spectrum of the ethanol extract of RN propolis in DMSO-*d*<sub>6</sub>

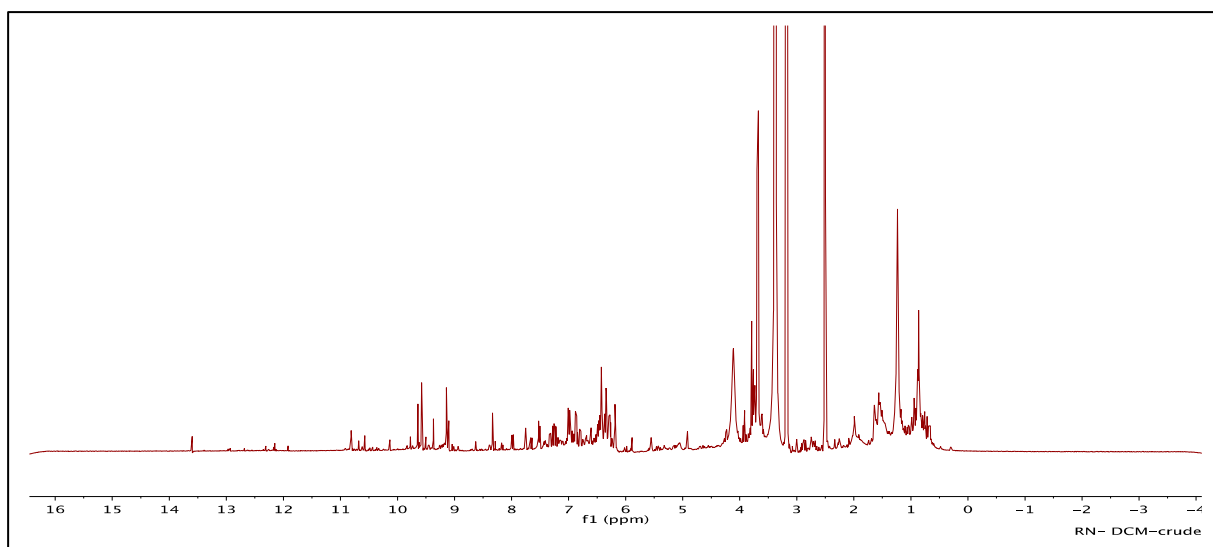

Figure S2:  $^1\text{H}$  NMR (500 MHz) spectrum of RN-Sup 1 in  $\text{DMSO-}d_6$

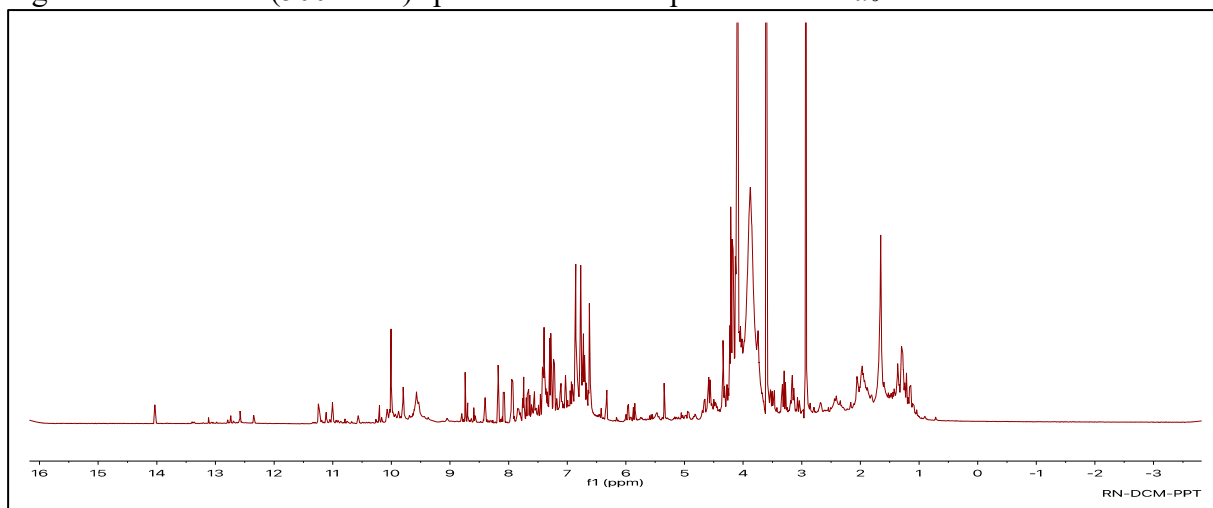

Figure S3:  $^1\text{H}$  NMR (500 MHz) spectrum of RN-ppt1 in  $\text{DMSO-}d_6$

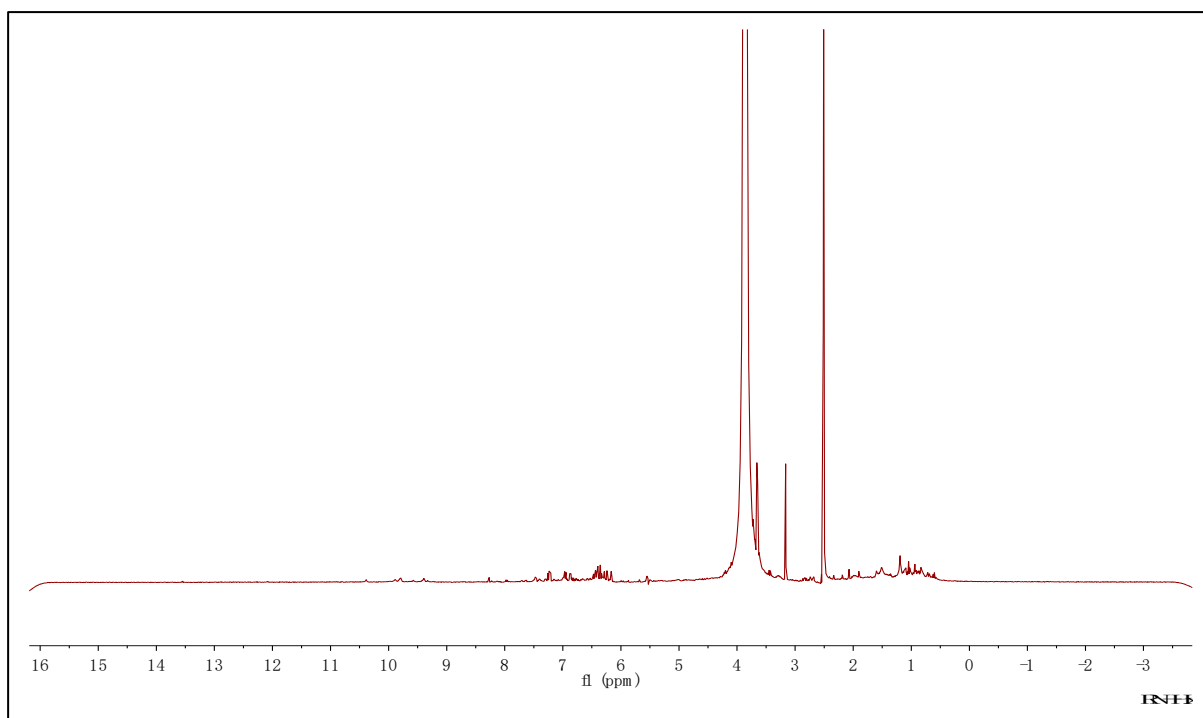

Figure S4 <sup>1</sup>H NMR (500 MHz) spectrum of RN-Sup 2 in DMSO-*d*<sub>6</sub>

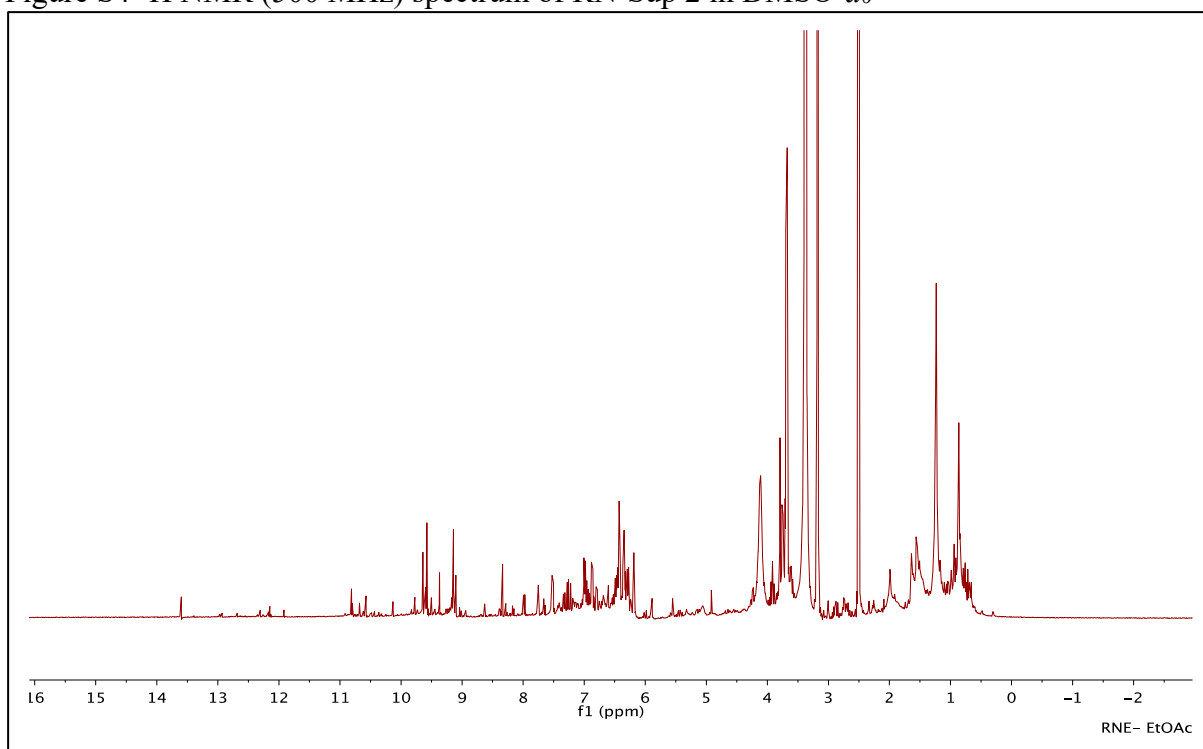

Figure S5 <sup>1</sup>H NMR (500 MHz) spectrum of RN-ppt2 in DMSO-*d*<sub>6</sub>

Table S1 High resolution MS profiling of RN-Sup1 crude using negative ion masses

| Peak<br>no | RT<br>(min) | M-1 | Formula | RDB | Delta<br>(ppm) | Intensity |
|------------|-------------|-----|---------|-----|----------------|-----------|
|------------|-------------|-----|---------|-----|----------------|-----------|

|    |       |          |                                                |      |        |                       |
|----|-------|----------|------------------------------------------------|------|--------|-----------------------|
| 1  | 9.01  | 315.0867 | C <sub>17</sub> H <sub>15</sub> O <sub>6</sub> | 10.5 | -2.25  | 1.78x 10 <sup>6</sup> |
| 2  | 11.24 | 271.0608 | C <sub>16</sub> H <sub>11</sub> O <sub>5</sub> | 10.5 | -1.61  | 1.67x 10 <sup>6</sup> |
| 3  | 12.83 | 255.0659 | C <sub>15</sub> H <sub>11</sub> O <sub>4</sub> | 10.5 | -1.65  | 2.21x10 <sup>6</sup>  |
|    |       | 301.0712 | C <sub>16</sub> H <sub>13</sub> O <sub>6</sub> | 10.5 | -1.96  |                       |
| 4  | 13.41 | 267.0657 | C <sub>16</sub> H <sub>11</sub> O <sub>4</sub> | 11.5 | -2.29  | 3.91x10 <sup>6</sup>  |
| 5  | 13.66 | 267.0660 | C <sub>16</sub> H <sub>11</sub> O <sub>4</sub> | 11.5 | -1.31  | 3.51x10 <sup>6</sup>  |
| 6  | 14.53 | 271.0971 | C <sub>16</sub> H <sub>15</sub> O <sub>4</sub> | 9.5  | -1.85  | 2.34x10 <sup>6</sup>  |
| 7  | 15.87 | 271.0971 | C <sub>16</sub> H <sub>15</sub> O <sub>4</sub> | 9.5  | -1.85  | 1.82x10 <sup>6</sup>  |
| 8  | 16.18 | 269.0814 | C <sub>16</sub> H <sub>13</sub> O <sub>4</sub> | 10.5 | -2.13  | 1.11x10 <sup>7</sup>  |
| 9  | 17.72 | 255.0656 | C <sub>15</sub> H <sub>11</sub> O <sub>4</sub> | 10.5 | -2.12  | 6.68x10 <sup>6</sup>  |
| 10 | 17.96 | 266.0579 | C <sub>16</sub> H <sub>10</sub> O <sub>4</sub> | 12.0 | -2.02  | 8.20x10 <sup>6</sup>  |
| 11 | 18.82 | 285.1128 | C <sub>17</sub> H <sub>17</sub> O <sub>4</sub> | 9.5  | -1.446 | 5.24x10 <sup>5</sup>  |
| 12 | 20.31 | 240.0422 | C <sub>14</sub> H <sub>8</sub> O <sub>4</sub>  | 11.0 | -2.49  | 7.35x10 <sup>5</sup>  |
|    |       |          | C <sub>16</sub> H <sub>15</sub> O <sub>4</sub> | 9.5  | -0.97  |                       |

Table S2: High resolution MS profiling of RN-ppt 2 using negative ion masses

| <i>Peak<br/>no</i> | <i>RT<br/>(min)</i> | <i>M-1</i> | <i>Formula</i>                                 | <i>RDB</i> | <i>Delta<br/>(ppm)</i> | <i>Intensity</i>     |
|--------------------|---------------------|------------|------------------------------------------------|------------|------------------------|----------------------|
| 1                  | 6.72                | 287.0562   | C <sub>15</sub> H <sub>11</sub> O <sub>6</sub> | 10.5       | 0.45                   | 7.93x10 <sup>6</sup> |
|                    |                     | 329.1607   | C <sub>16</sub> H <sub>25</sub> O <sub>7</sub> | 4.5        | 0.41                   |                      |
| 2                  | 15.29               | 323.1291   | C <sub>20</sub> H <sub>19</sub> O <sub>4</sub> | 11.5       | 0.55                   | 2.37x10 <sup>7</sup> |
| 3                  | 15.84               | 439.1763   | C <sub>25</sub> H <sub>27</sub> O <sub>7</sub> | 12.5       | 0.24                   | 1.36x10 <sup>7</sup> |
| 4                  | 16.53               | 455.1715   | C <sub>25</sub> H <sub>27</sub> O <sub>8</sub> | 12.5       | 0.88                   | 1.88x10 <sup>7</sup> |
| 5                  | 17.52               | 339.1240   | C <sub>20</sub> H <sub>19</sub> O <sub>5</sub> | 12.5       | 0.48                   | 2.76x10 <sup>7</sup> |
| 6                  | 17.91               | 383.1141   | C <sub>21</sub> H <sub>19</sub> O <sub>7</sub> | 12.5       | 1.16                   | 9.84x10 <sup>7</sup> |
| 7                  | 18.56               | 395.1138   | C <sub>22</sub> H <sub>19</sub> O <sub>7</sub> | 13.5       | 0.36                   | 2.32x10 <sup>7</sup> |
|                    |                     | 339.1240   | C <sub>20</sub> H <sub>19</sub> O <sub>5</sub> | 11.5       | 0.66                   |                      |
| 8                  | 19.29               | 381.1346   | C <sub>25</sub> H <sub>21</sub> O <sub>6</sub> | 12.5       | 0.57                   | 5.77x10 <sup>7</sup> |
|                    |                     | 319.2280   | C <sub>20</sub> H <sub>31</sub> O <sub>3</sub> | 5.5        | 0.41                   |                      |
| 9                  | 19.82               | 417.2288   | C <sub>24</sub> H <sub>33</sub> O <sub>6</sub> | 8.5        | 1.33                   | 1.72x10 <sup>7</sup> |
|                    |                     | 485.3277   | C <sub>30</sub> H <sub>45</sub> O <sub>5</sub> | 8.5        | 0.87                   |                      |
| 10                 | 20.78               | 339.1240   | C <sub>20</sub> H <sub>19</sub> O <sub>5</sub> | 11.5       | 0.57                   | 2.36x10 <sup>7</sup> |
|                    |                     | 483.2025   | C <sub>27</sub> H <sub>31</sub> O <sub>8</sub> | 12.5       | 0.54                   |                      |
| 11                 | 21.44               | 367.1190   | C <sub>21</sub> H <sub>19</sub> O <sub>6</sub> | 12.5       | 0.76                   | 7.76x10 <sup>7</sup> |
|                    |                     | 339.1241   | C <sub>20</sub> H <sub>19</sub> O <sub>5</sub> | 11.5       | 1.04                   |                      |
| 12                 | 23.20               | 423.1818   | C <sub>25</sub> H <sub>27</sub> O <sub>6</sub> | 12.5       | 1.20                   | 3.62x10 <sup>7</sup> |
| 13                 | 23.52               | 423.1815   | C <sub>25</sub> H <sub>27</sub> O <sub>6</sub> | 12.5       | 0.49                   | 1.46x10 <sup>7</sup> |
|                    |                     | 323.1291   | C <sub>20</sub> H <sub>19</sub> O <sub>4</sub> | 11.5       | 0.64                   |                      |
| 14                 | 24.92               | 407.1865   | C <sub>25</sub> H <sub>27</sub> O <sub>5</sub> | 12.5       | 0.30                   | 6.65x10 <sup>7</sup> |

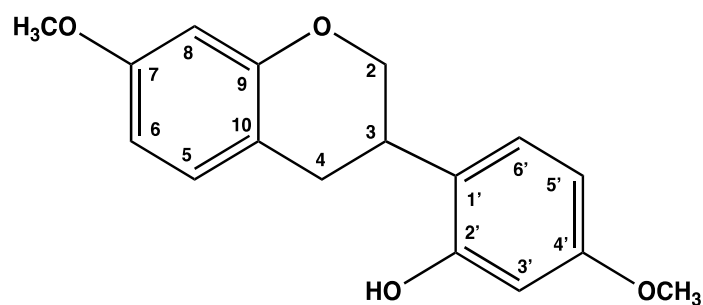

Chemical Formula:  $C_{17}H_{18}O_4$

Figure S6: Structure of 7-*O*-methylvestitol

Table S3  $^1H$  (400MHz),  $^{13}C$  (100MHz) chemical shifts in  $CDCl_3$  7-*O*-methylvestitol.  $^*CD_3OD$

| Position            | $^1H$ $\delta$ ppm (mult, $J$ Hz)                              | $^{13}C$ $\delta$ ppm (mult) | $^1H$ $\delta$ ppm*<br>From literature <sup>1</sup> | $^{13}C$ $\delta$ ppm*<br>From literature <sup>1</sup> |
|---------------------|----------------------------------------------------------------|------------------------------|-----------------------------------------------------|--------------------------------------------------------|
| 2                   | 4.34 (1H, ddd, 10.5, 3.5, 2.0) 4.05 (1H, m)                    | 69.9 (CH <sub>2</sub> )      | 4.22, 3.85                                          | 55.6                                                   |
| 3                   | 3.51 (1H, m)                                                   | 31.7 (CH)                    | 3.41                                                | 33.1                                                   |
| 4                   | 3.01 (1H, ddd, 15.7, 10.5, 1.1) 2.91 (1H, ddd, 15.8, 5.4, 1.9) | 30.3 (CH <sub>2</sub> )      | 2.7, 2.86                                           | 31.3                                                   |
| 5                   | 7.01 (1H, d, 8.5)                                              | 128.2 (CH)                   | 6.9                                                 | 131.2                                                  |
| 6                   | 6.47 (1H, dd, 8.4, 2.6)                                        | 107.2 (CH)                   | 6.47                                                | 107.9                                                  |
| 7                   | -                                                              | 159.0 (C)                    | -                                                   | 160.8                                                  |
| 8                   | 6.36 (1H, d, 2.5)                                              | 102.1 (CH)                   | 6.38                                                | 102.5                                                  |
| 9                   | -                                                              | 155.0 (C)                    | -                                                   | 157.3                                                  |
| 10                  | -                                                              | 119.9 (C)                    | -                                                   | 116.0                                                  |
| 1'                  | -                                                              | 114.4 (C)                    | -                                                   | 121.3                                                  |
| 2'                  | -                                                              | 154.2 (C)                    | -                                                   | 156.2                                                  |
| 3'                  | 6.42 (1H, d, 2.6)                                              | 101.4 (CH)                   | 6.4                                                 | 102.5                                                  |
| 4'                  | -                                                              | 159.3 (C)                    | -                                                   | 160.5                                                  |
| 5'                  | 6.47 (1H, dd, 8.4, 2.6)                                        | 106.1 (CH)                   | 6.27                                                | 105.8                                                  |
| 6'                  | 6.98 (1H, dd, 8.3, 1.0)                                        | 130.2 (CH)                   | 6.85                                                | 128.8                                                  |
| 7-OCH <sub>3</sub>  | 3.77 (3H, s)                                                   | 55.3 (CH <sub>3</sub> )      | 3.41                                                | 55.6                                                   |
| 4'-OCH <sub>3</sub> | 3.77 (3H, s)                                                   | 55.3 (CH <sub>3</sub> )      | 3.41                                                | 55.6                                                   |

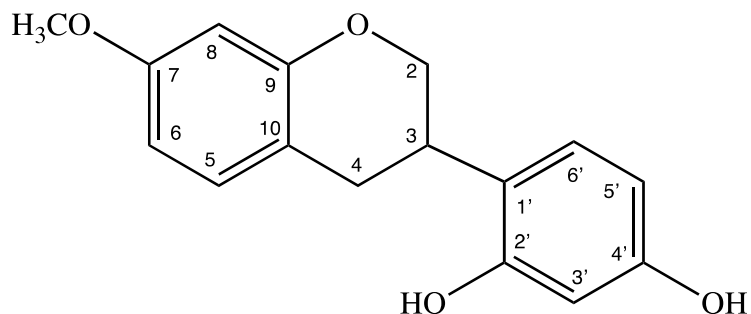

Chemical Formula:  $C_{16}H_{16}O_4$

Figure S7 Structure of 2',4'-dihydroxy-7-methoxyisoflavan (neovestitol)

Table S4:  $^1H$  (400MHz),  $^{13}C$  (100MHz) data for neovestitol in Acetone- $d_6$ . \* $CD_3OD$

| Position | $^1H$ $\delta$ ppm<br>(mult, J Hz)                          | $^{13}C$ $\delta$ ppm<br>(mult) |  | $^1H$ $\delta$ ppm*<br>From<br>literature <sup>2</sup> |  |  | $^{13}C$ $\delta$ ppm*<br>From<br>literature <sup>2</sup> |
|----------|-------------------------------------------------------------|---------------------------------|--|--------------------------------------------------------|--|--|-----------------------------------------------------------|
| 2        | 4.26 (1H, ddd, 10.3, 3.5, 2.0)<br>4.00 (1H, t, 10.1)        | 69.6 (CH <sub>2</sub> )         |  | 4.32, 4.04                                             |  |  | 69.91                                                     |
| 3        | 3.50 (1H, dt, 10.4, 4.3)                                    | 31.8 (CH)                       |  | 3.50                                                   |  |  | 31.75                                                     |
| 4        | 2.98 (1H, dd, 15.6, 11.0)<br>2.82 (1H, ddd, 15.6, 5.3, 1.9) | 30.2 (CH <sub>2</sub> )         |  | 2.98, 2.91                                             |  |  | 30.35                                                     |
| 5        | 7.07 (1H, d, 8.5)                                           | 127.9 (CH)                      |  | 6.98                                                   |  |  | 130.18                                                    |
| 6        | 6.38 (1H, dd, 8.2, 2.5)                                     | 107.9 (CH)                      |  | 6.48                                                   |  |  | 107.29                                                    |
| 7        | -                                                           | 159.5 (C)                       |  | -                                                      |  |  | 159.14                                                    |
| 8        | 6.52 (1H, d, 2.6)                                           | 101.6 (CH)                      |  | 6.42                                                   |  |  | 101.46                                                    |
| 9        | -                                                           | 156.6 (C)                       |  | -                                                      |  |  | 155.2                                                     |
| 10       | -                                                           | 113.4 (C)                       |  | -                                                      |  |  | 114.41                                                    |
| 1'       | -                                                           | 120.1 (C)                       |  | -                                                      |  |  | 120.08                                                    |
| 2'       | -                                                           | 155.2 (C)                       |  | -                                                      |  |  | 154.36                                                    |
| 3'       | 6.31 (1H, d, 2.4)                                           | 102.8 (CH)                      |  | 6.31                                                   |  |  | 103.13                                                    |
| 4'       | -                                                           | 155.8 (C)                       |  | -                                                      |  |  | 155.11                                                    |

|                     |                         |                         |  |      |  |  |        |
|---------------------|-------------------------|-------------------------|--|------|--|--|--------|
| 5'                  | 6.44 (1H, dd, 8.5, 2.6) | 104.8 (CH)              |  | 6.38 |  |  | 108.2  |
| 6'                  | 6.91 (1H, d, 8.2)       | 130.1 (CH)              |  | 6.95 |  |  | 128.44 |
| 7- OCH <sub>3</sub> | 3.74 (3H, s)            | 54.5 (CH <sub>3</sub> ) |  | 3.77 |  |  | 55.35  |

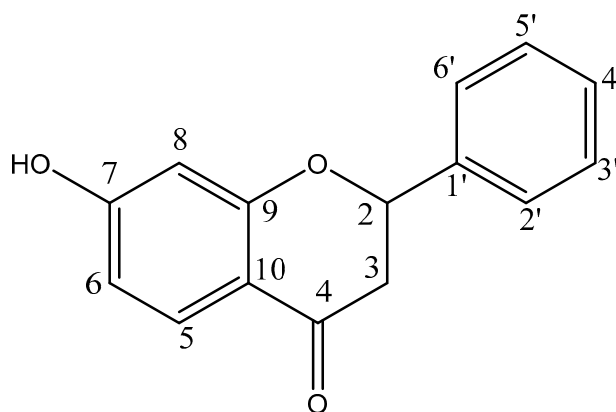

Chemical Formula: C<sub>15</sub>H<sub>12</sub>O<sub>3</sub>

Figure S8: Structure of 7-hydroxyflavanone

Table S5: <sup>1</sup>H (400MHz), <sup>13</sup>C (100 MHz) chemical shifts for 7-Hydroxyflavanone in CDCl<sub>3</sub>. \*CD<sub>3</sub>OD

| Position | <sup>1</sup> H δ ppm (mult, J Hz)                  | <sup>13</sup> C δ ppm (mult) | <sup>1</sup> H δ ppm*<br>From literature <sup>3</sup> | <sup>13</sup> C δ ppm*<br>From literature <sup>3</sup> |
|----------|----------------------------------------------------|------------------------------|-------------------------------------------------------|--------------------------------------------------------|
| 2        | 5.46 (1H, dd, 13.2, 2.8)                           | 80.0 (CH)                    | 5.43                                                  | 81.1                                                   |
| 3        | 3.05 (1H, dd, 17.0, 13.3) 2.84 (1H, dd, 16.9, 2.9) | 44.4 (CH <sub>2</sub> )      | 2.96, 2.69                                            | 45.2                                                   |
| 4        | -                                                  | 191.5 (C)                    | -                                                     | 193.1                                                  |
| 5        | 7.85 (1H, d, 8.7)                                  | 129.5 (CH)                   | 7.67                                                  | 129.9                                                  |
| 6        | 6.55 (1H, dd, 7.5, 2.3)                            | 111.0 (CH)                   | 6.44                                                  | 111.9                                                  |
| 7        | -                                                  | 163.7 (C)                    | -                                                     | 166.9                                                  |
| 8        | 6.42 (1H, d, 2.4)                                  | 103.6 (CH)                   | 6.32                                                  | 103.9                                                  |
| 9        | -                                                  | 163.9 (C)                    | -                                                     | 165.9                                                  |
| 10       | -                                                  | 114.9 (C)                    | -                                                     | 115.1                                                  |
| 1'       | -                                                  | 138.8 (C)                    | -                                                     | 138.8                                                  |
| 2'       | 7.44 (1H, m)                                       | 126.3 (CH)                   | 7.43                                                  | 127.4                                                  |
| 3'       | 7.44 (1H, m)                                       | 129.0 (CH)                   | 7.33                                                  | 129.7                                                  |

|    |              |            |      |       |
|----|--------------|------------|------|-------|
| 4' | 7.38 (1H, m) | 129.5 (CH) | 7.33 | 129.6 |
| 5' | 7.44 (1H, m) | 129.0 (CH) | 7.33 | 129.7 |
| 6' | 7.44 (1H, m) | 126.3 (CH) | 7.33 | 127.4 |

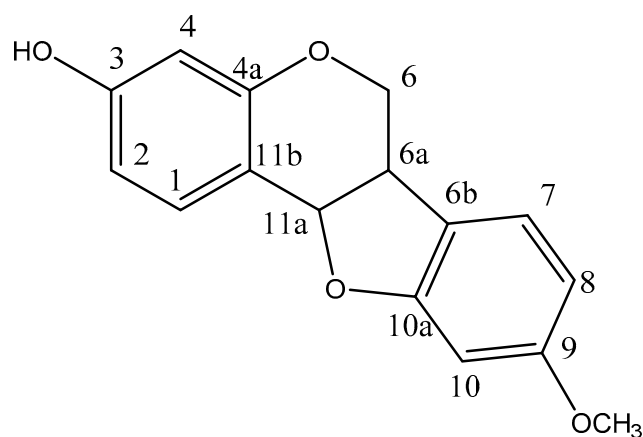

Chemical Formula:  $C_{16}H_{14}O_4$

Figure S19 : Structure of medicarpin

Table S6:  $^1H$  (400MHz),  $^{13}C$  (100MHz) chemical shifts for medicarpin in  $CDCl_3$ . \* $CD_3OD$

| Position | Proton $\delta$ ppm (mult, $J$ Hz)                      | Carbon $\delta$ ppm (mult) | Proton $\delta$ ppm*<br>From literature <sup>1,4</sup> | Carbon $\delta$ ppm*<br>From literature <sup>1,4</sup> |
|----------|---------------------------------------------------------|----------------------------|--------------------------------------------------------|--------------------------------------------------------|
| 1        | 7.41 (1H, d, 8.4)                                       | 132.3 (CH)                 | 7.31                                                   | 133.2                                                  |
| 2        | 6.57 (1H, dd, 8.4, 2.5)                                 | 109.5 (CH)                 | 6.52                                                   | 110.7                                                  |
| 3        | -                                                       | 156.8 (C)                  | -                                                      | 160.1                                                  |
| 4        | 6.48 (1H, m)                                            | 96.9(CH)                   | 6.33                                                   | 104.1                                                  |
| 4a       | -                                                       | 157.3 (C)                  | -                                                      | 158.0                                                  |
| 6        | 4.26 (1H, ddd $J$ =11.04, 5.1, 0.7) 3.65 (1H, dd, 11.0) | 66.7 (CH <sub>2</sub> )    | 4.23, 3.59                                             | 67.6                                                   |
| 6a       | 3.56 (1H, ddd, 11.1, 6.7, 5.0)                          | 39.6 (CH)                  | 3.57                                                   | 40.9                                                   |



|                      |                    |                         |      |       |
|----------------------|--------------------|-------------------------|------|-------|
| 6b                   | -                  | 119.3 (C)               | -    | 120.9 |
| 7                    | 7.15 (1H, d , 8.8) | 124.9 (CH)              | 7.18 | 126.0 |
| 8                    | 6.49 (1H, m)       | 106.1 (CH)              | 6.4  | 107.3 |
| 9                    | -                  | 160.8 (C)               | -    | 162.6 |
| 10                   | 6.44 (1H, m)       | 103.7 (CH)              | 6.46 | 97.6  |
| 10 a                 | -                  | 161.2 (C)               | -    | 162.0 |
| 11a                  | 5.52 (1H, d, 6.8)  | 78.7 (CH)               | 5.48 | 67.6  |
| 11 b                 | -                  | 112.7 (C)               | -    | 112.9 |
| 9'- OCH <sub>3</sub> | 3.79 (3H, s)       | 55.7 (CH <sub>3</sub> ) | 3.76 | 55.9  |

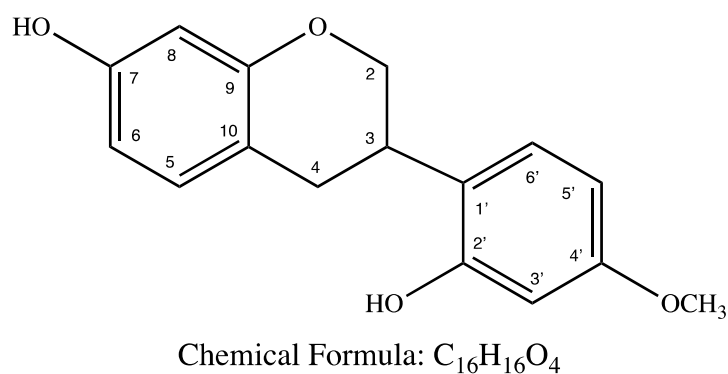

Figure S10: Structure of vestitol

Table S7 <sup>1</sup>H (400MHz), <sup>13</sup>C (100MHz) chemical shifts for vestitol in CDCl<sub>3</sub>. \*CD<sub>3</sub>OD

| Position | Proton δ ppm (mult, J Hz)                         | Carbon δ ppm (mult)     | <sup>1</sup> H δ ppm*<br>From literature <sup>1</sup> | <sup>13</sup> C δ ppm*<br>From literature <sup>1</sup> |
|----------|---------------------------------------------------|-------------------------|-------------------------------------------------------|--------------------------------------------------------|
| 2        | 4.33 (1H, ddd, 10.4, 3.5, 2.0) 4.03 (1H, t, 10.1) | 70.1 (CH <sub>2</sub> ) | 4.17, 3.83                                            | 70.9                                                   |
| 3        | 3.50 (1H, m)                                      | 31.9 (CH)               | 3.4                                                   | 32.7                                                   |

|                      |                                                       |                         |            |       |
|----------------------|-------------------------------------------------------|-------------------------|------------|-------|
| 4                    | 2.98 (1H, dd, 15.8, 10.4)<br>2.89 (1H, dd, 15.8, 5.4) | 30.5 (CH <sub>2</sub> ) | 2.81, 2.66 | 31.0  |
| 5                    | 6.93 (1H, dd, 7.97, 1.08)                             | 130.6 (CH)              | 6.79       | 131.6 |
| 6                    | 6.39 (1H, dd, 8.5, 2.6)                               | 108.2 (CH)              | 6.32       | 109.2 |
| 7                    | -                                                     | 155.0 (C)               | -          | 156.7 |
| 8                    | 6.37 (1H, d, 2.5)                                     | 102.3 (CH)              | 6.25       | 102.3 |
| 9                    | -                                                     | 155.2 (C)               | -          | 156.0 |
| 10                   | -                                                     | 114.8 (C)               | -          | 115.4 |
| 1'                   | -                                                     | 120.1 (C)               | -          | 121.5 |
| 2'                   | -                                                     | 154.5 (C)               | -          | 156.7 |
| 3'                   | 6.36 (1H, d, 2.6)                                     | 103.4 (CH)              | 6.38       | 101.7 |
| 4'                   | -                                                     | 159.5 (C)               | -          | 160.4 |
| 5'                   | 6.47 (1H, dd, 8.5, 2.5)                               | 106.1 (CH)              | 6.28       | 105.7 |
| 6'                   | 7.00 (1H, d, 8.5)                                     | 128.3 (CH)              | 6.79       | 128.7 |
| 4'- OCH <sub>3</sub> | 3.76 (3H, s)                                          | 55.5 (CH <sub>3</sub> ) | 3.62       | 55.1  |

1. Piccinelli, A. L.; Campo Fernandez, M.; Cuesta-Rubio, O.; Márquez Hernández, I.; De Simone, F.; Rastrelli, L. Isoflavonoids isolated from Cuban propolis. *J. Agric. Food Chem.* **2005**, *53*, 9010–9016.
2. Franchin, M.; Colón, D.F.; da Cunha, M.G.; Castanheira, F.V.; Saraiva, A.L.; Bueno-Silva, B.; Alencar, S.M.; Cunha, T.M.; Rosalen, P. Neovestitol, an isoflavonoid isolated from Brazilian red propolis, reduces acute and chronic inflammation: involvement of nitric oxide and IL-6. *Scientific Reports*, **2016**, *6*, 1-12.
3. Kostrzewa-Susłow, E.; Janeczko, T. Microbial transformations of 7-hydroxyflavanone. *The Sci. World J.* **2012**, *2012*, 254929.
4. Yang, X.; Zhao, Y.; Hsieh, M.T.; Xin, G.; Wu, R.T.; Hsu, P.L.; Horng, L.Y.; Sung, H.C.; Cheng, C.H.; Lee, K.H. Total synthesis of (+)-medicarpin. *Journal of Natural products*, **2017**, *80*, 3284-3288.
